# Supplementary material for: Synthesis and magnetic property of cobalt hydroxide carbonate and cobalt oxide nanowires
Source: Royal Society of Chemistry journal article supplement (doi:10.1039/c2ce25557j), 2012-01-01
Supplement: c2ce25557j.pdf [file c2ce25557j.pdf]

## Supplementary Information

### Synthesis and Magnetic Property of Cobalt Hydroxide Carbonate and Cobalt Oxide Nanowires

Mitsunori Yada\*, Yuko Inoue, Masayuki Koikawa, Toshio Torikai, and Takanori Watari

Saga University, Department of Chemistry and Applied Chemistry, Faculty of Science and Engineering, 1 Honjo, Saga 840-8502, Japan. E-mail: yada@cc.saga-u.ac.jp

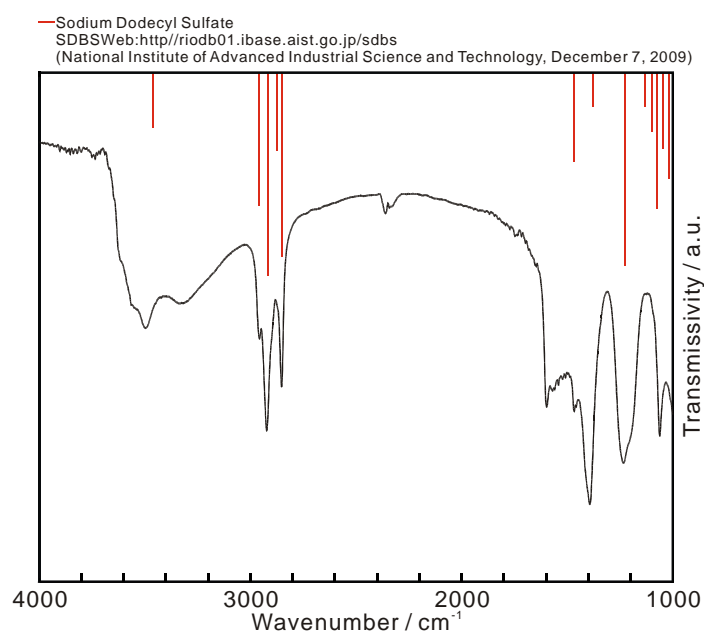

Fig. S1 FT-IR spectrum of the as-grown cobalt compound synthesized by using SDS as the additive with  $x = 1000$ .

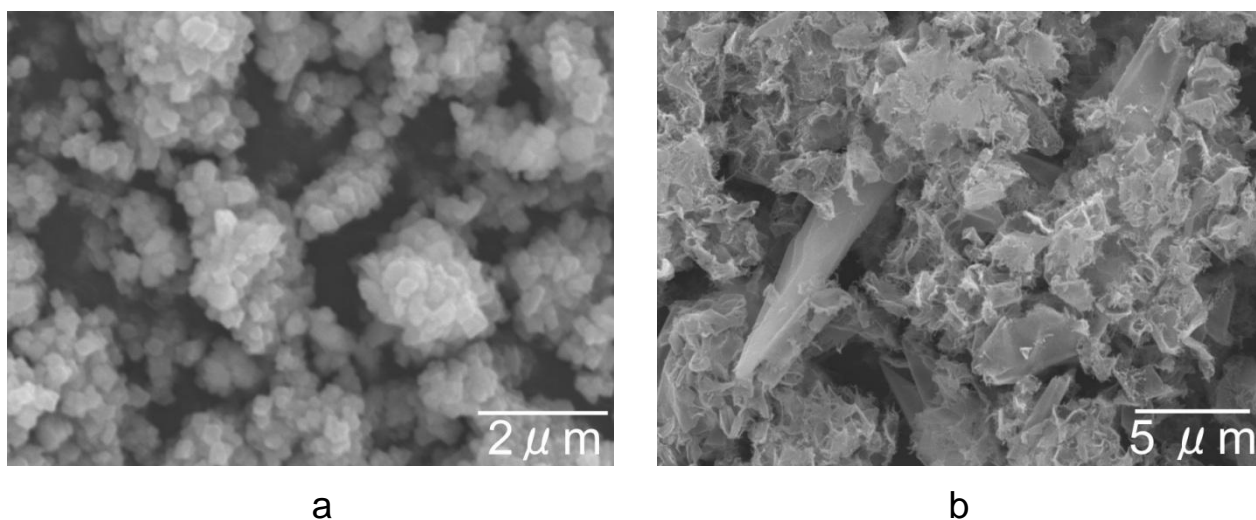

Fig. S2 SEM images of cobalt compounds synthesized using SDS as the additive with  $x = 100$  (a) and 5000 (b).

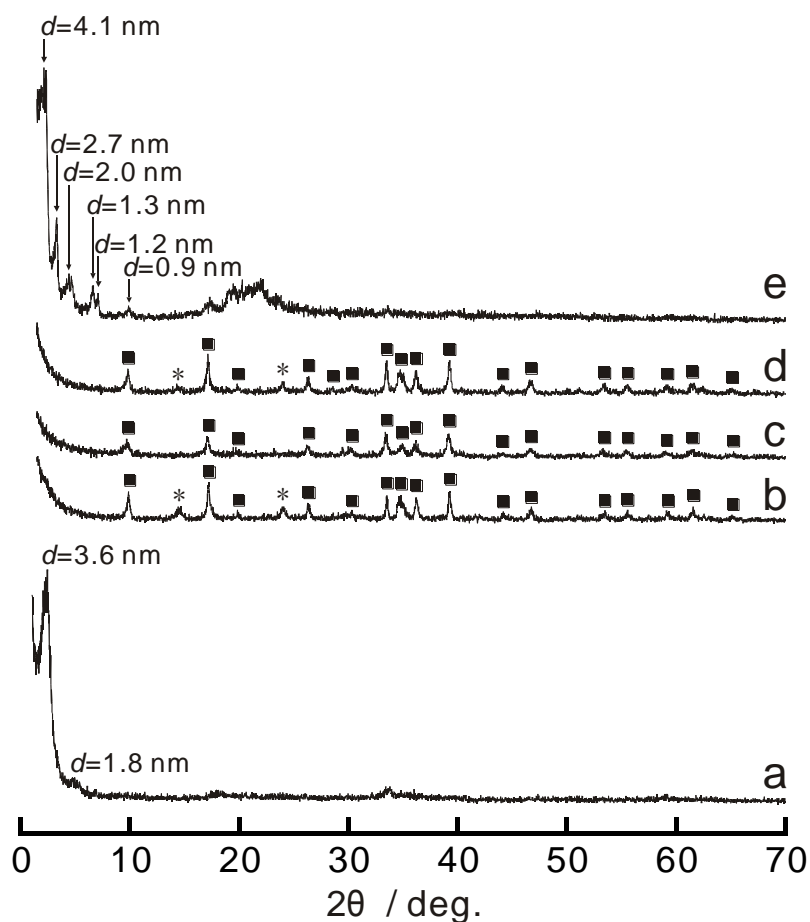

Fig. S3 XRD patterns of the cobalt compounds synthesized with  $x = 1000$  and using the following additives: (a) SDS, (b) no additive, (c)  $\text{Na}_2\text{SO}_4 \cdot 10\text{H}_2\text{O}$ , (d)  $\text{C}_6\text{H}_{13}\text{OSO}_3\text{Na}$ , and (e) a mixture of  $\text{C}_{16}\text{H}_{33}\text{OSO}_3\text{Na}$  and  $\text{C}_{18}\text{H}_{37}\text{OSO}_3\text{Na}$ . Peak assignment: ■,  $\text{Co}(\text{OH})_x(\text{CO}_3)_{0.5(2-x)} \cdot n\text{H}_2\text{O}$ ; \*, unknown peak.

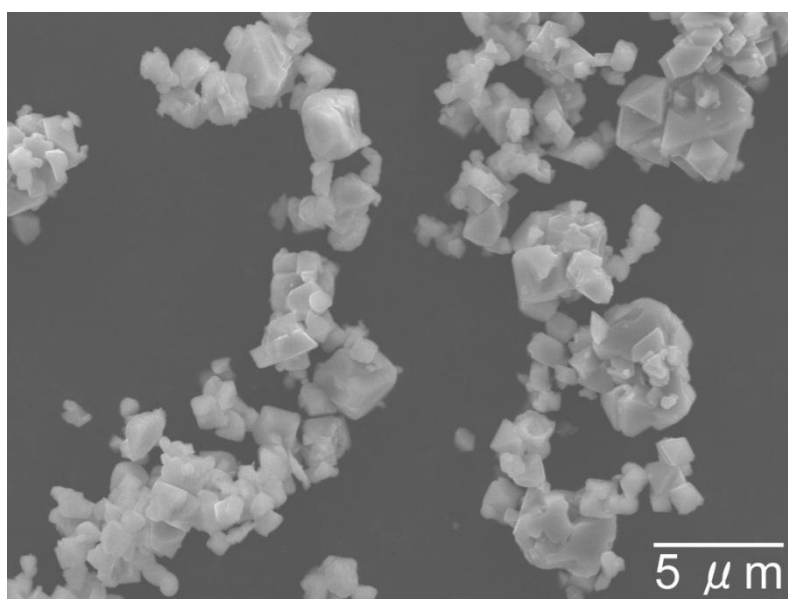

Fig. S4 SEM image of commercially available  $\text{Co}_3\text{O}_4$  bulk powder.
